# Supplementary material for: Permeability of the HIV-1 capsid to metabolites modulates viral DNA synthesis
Source: PLoS Biol. 2020 Dec 17;18(12):e3001015. doi: 10.1371/journal.pbio.3001015 (PMC7775124; doi:10.1371/journal.pbio.3001015)
Supplement: S4 Table — (XLSX) [file pbio.3001015.s025.xlsx]

## Sheet: Table 1
ZdATP (Å)	ddATP-R18_1 (Å)	ddATP-R18_2 (Å)	ddATP-R18_3 (Å)	ddATP-R18_4 (Å)	ddATP-R18_5 (Å)	ddATP-R18_6 (Å)
20	21.34 ± 4.11	20.35 ± 3.53	19.59 ± 3.04	20.31 ± 2.46	20.39 ± 2.73	21.68 ± 3.42
19.25	20.43 ± 4.46	19.28 ± 3.98	18.71 ± 3.25	19.38 ± 2.69	19.84 ± 2.99	20.76 ± 3.68
18.5	19.69 ± 4.04	18.59 ± 3.74	18.21 ± 3.33	18.84 ± 3.02	19.03 ± 2.99	20.04 ± 3.60
17.75	19.39 ± 3.88	18.24 ± 3.83	17.82 ± 3.51	18.10 ± 3.20	18.31 ± 3.26	19.36 ± 3.67
17	18.23 ± 2.87	16.95 ± 2.92	16.84 ± 2.95	17.21 ± 3.04	17.55 ± 3.00	18.33 ± 3.10
16.25	17.72 ± 3.41	16.18 ± 3.62	15.70 ± 3.43	15.98 ± 3.23	16.52 ± 3.13	17.18 ± 3.32
15.5	16.39 ± 3.86	14.59 ± 3.62	14.36 ± 3.13	14.85 ± 2.93	15.80 ± 3.24	15.80 ± 3.37
14.75	15.41 ± 3.86	13.73 ± 3.48	13.27 ± 2.76	14.16 ± 2.51	14.93 ± 2.97	14.87 ± 3.01
14	14.16 ± 3.33	12.64 ± 2.87	12.27 ± 2.18	13.09 ± 2.35	14.10 ± 2.75	14.31 ± 2.65
13.25	13.22 ± 3.64	11.89 ± 3.47	11.35 ± 2.73	11.95 ± 2.87	12.79 ± 3.23	13.85 ± 3.06
12.5	11.85 ± 2.43	10.16 ± 2.61	10.02 ± 1.93	10.02 ± 2.25	11.32 ± 2.39	12.32 ± 2.15
11.75	10.91 ± 2.14	9.26 ± 1.77	9.26 ± 1.23	9.38 ± 1.89	10.43 ± 1.89	11.65 ± 1.76
11	10.69 ± 2.20	8.82 ± 1.61	8.94 ± 1.18	9.48 ± 1.91	10.26 ± 1.75	10.91 ± 1.71
10.25	10.27 ± 2.17	8.15 ± 1.79	8.54 ± 1.28	9.25 ± 1.83	10.38 ± 1.89	10.44 ± 1.50
9.5	9.96 ± 2.21	7.82 ± 2.00	8.18 ± 1.30	8.84 ± 1.79	9.98 ± 2.05	10.12 ± 1.44
8.75	10.33 ± 2.20	7.14 ± 2.00	7.55 ± 1.23	8.36 ± 1.76	10.15 ± 2.00	9.72 ± 1.30
8	9.51 ± 2.26	6.77 ± 1.80	7.42 ± 1.27	8.62 ± 2.19	9.46 ± 1.57	9.29 ± 1.60
7.25	9.13 ± 2.18	6.48 ± 1.86	7.28 ± 1.43	8.28 ± 1.97	9.05 ± 1.39	9.27 ± 1.68
6.5	8.62 ± 2.20	5.92 ± 1.66	7.12 ± 1.39	8.10 ± 1.64	8.61 ± 1.34	9.23 ± 1.64
5.75	8.68 ± 2.16	6.23 ± 1.76	7.21 ± 1.37	7.99 ± 1.56	8.42 ± 1.22	8.96 ± 1.50
5	8.31 ± 2.06	6.39 ± 1.93	7.14 ± 1.33	8.14 ± 1.59	8.35 ± 1.24	9.06 ± 1.61
4.25	7.77 ± 1.66	6.11 ± 2.09	7.05 ± 1.41	8.17 ± 1.77	8.22 ± 1.63	8.81 ± 1.89
3.5	7.43 ± 1.49	5.20 ± 2.00	6.90 ± 1.47	8.15 ± 1.45	8.14 ± 1.87	7.70 ± 1.88
2.75	7.16 ± 1.55	4.91 ± 1.94	6.90 ± 1.46	8.03 ± 1.35	8.04 ± 2.02	7.15 ± 1.94
2	6.80 ± 1.50	4.79 ± 1.83	7.00 ± 1.33	8.00 ± 1.65	7.07 ± 2.35	6.15 ± 1.83
1.25	6.63 ± 1.47	5.08 ± 1.82	6.60 ± 1.37	7.31 ± 1.96	5.15 ± 2.02	5.57 ± 1.48
0.5	6.41 ± 1.63	5.29 ± 1.69	6.22 ± 1.55	6.25 ± 1.81	4.71 ± 1.83	5.43 ± 1.49
-0.25	6.20 ± 1.61	5.25 ± 1.78	5.76 ± 1.40	6.20 ± 1.74	4.57 ± 1.95	5.41 ± 1.68
-1	5.78 ± 1.33	4.88 ± 1.72	5.69 ± 1.30	6.23 ± 1.92	4.80 ± 2.16	5.32 ± 1.91
-1.75	4.77 ± 1.57	5.19 ± 1.62	5.76 ± 1.24	5.97 ± 1.70	3.94 ± 1.78	4.41 ± 2.04
-2.5	3.46 ± 1.23	5.82 ± 1.09	5.91 ± 0.99	5.58 ± 0.79	3.04 ± 0.98	2.66 ± 0.73
-3.25	3.40 ± 1.08	5.76 ± 1.06	6.31 ± 1.09	5.62 ± 0.71	2.94 ± 0.88	2.53 ± 0.49
-4	2.93 ± 1.02	5.76 ± 1.25	6.79 ± 1.29	5.72 ± 0.63	2.65 ± 0.66	2.41 ± 0.30
-4.75	2.62 ± 1.02	5.61 ± 1.20	7.03 ± 1.27	5.75 ± 0.59	2.46 ± 0.30	2.36 ± 0.24
-5.5	2.43 ± 0.78	5.72 ± 1.09	7.74 ± 1.42	5.89 ± 0.85	2.72 ± 1.15	2.38 ± 0.25
-6.25	2.39 ± 0.53	5.89 ± 0.92	8.72 ± 1.45	6.87 ± 1.72	4.33 ± 2.78	2.47 ± 0.35
-7	2.39 ± 0.33	5.74 ± 0.97	9.14 ± 1.17	8.16 ± 1.84	6.53 ± 2.82	2.55 ± 0.40
-7.75	2.38 ± 0.32	5.72 ± 1.12	9.33 ± 1.13	8.70 ± 1.52	7.20 ± 2.39	2.64 ± 0.41
-8.5	2.39 ± 0.35	6.03 ± 1.24	9.49 ± 1.00	8.85 ± 1.24	7.05 ± 2.22	2.58 ± 0.39
-9.25	2.40 ± 0.46	6.13 ± 1.43	9.40 ± 1.21	8.74 ± 1.30	6.76 ± 2.28	2.58 ± 0.43
-10	2.34 ± 0.56	6.08 ± 1.61	9.04 ± 1.39	8.23 ± 1.57	6.84 ± 2.24	2.49 ± 0.42
-10.75	2.24 ± 0.78	6.17 ± 1.63	7.71 ± 2.11	6.75 ± 2.19	5.66 ± 2.14	2.29 ± 0.47
-11.5	2.72 ± 1.22	6.29 ± 1.72	6.29 ± 2.08	4.82 ± 1.83	3.87 ± 1.98	2.16 ± 0.76
-12.25	2.94 ± 1.41	5.10 ± 2.00	5.50 ± 2.05	3.95 ± 1.88	2.97 ± 1.85	2.44 ± 1.34
-13	2.46 ± 1.11	4.26 ± 1.77	5.71 ± 1.83	4.55 ± 2.24	3.02 ± 1.55	2.41 ± 1.43
-13.75	2.32 ± 0.93	4.01 ± 1.69	6.11 ± 1.92	4.93 ± 2.19	3.09 ± 1.50	2.28 ± 1.34
-14.5	2.36 ± 1.10	4.25 ± 1.90	6.40 ± 1.95	4.90 ± 2.26	3.17 ± 1.64	2.48 ± 1.56
-15.25	2.62 ± 1.20	4.60 ± 1.90	6.19 ± 1.87	4.52 ± 2.09	2.74 ± 1.42	2.55 ± 1.46
-16	3.17 ± 1.69	5.02 ± 2.09	5.90 ± 1.80	4.26 ± 2.10	2.71 ± 1.67	3.00 ± 1.77
-16.75	3.63 ± 2.40	5.48 ± 2.41	6.29 ± 2.34	4.26 ± 2.24	2.89 ± 1.91	3.40 ± 1.88
-17.5	4.80 ± 3.33	6.74 ± 2.94	7.65 ± 2.88	5.19 ± 2.37	3.30 ± 2.07	3.75 ± 2.44
-18.25	7.41 ± 3.73	9.33 ± 2.95	10.21 ± 2.81	6.88 ± 2.75	4.50 ± 2.22	5.18 ± 2.89
-19	8.25 ± 3.47	10.31 ± 2.44	11.63 ± 2.42	8.21 ± 3.08	5.53 ± 2.46	6.15 ± 2.88
-19.75	8.46 ± 3.32	10.85 ± 2.68	12.58 ± 2.39	9.70 ± 2.71	6.92 ± 2.69	7.22 ± 2.86
-20.5	8.78 ± 2.97	11.11 ± 2.74	13.05 ± 2.35	10.77 ± 2.27	7.95 ± 2.96	7.82 ± 3.64
-21.25	10.60 ± 2.51	12.05 ± 2.67	13.74 ± 2.45	11.92 ± 2.08	9.40 ± 3.08	9.73 ± 3.97
-22	11.32 ± 2.12	12.83 ± 2.65	14.44 ± 2.92	12.96 ± 2.40	10.85 ± 2.98	11.10 ± 3.57
-22.75	12.06 ± 2.26	13.61 ± 2.79	15.47 ± 3.06	14.33 ± 2.34	12.71 ± 2.38	12.75 ± 2.96
-23.5	12.57 ± 3.32	14.42 ± 3.42	16.42 ± 3.15	15.80 ± 2.52	14.23 ± 2.90	14.08 ± 3.96
-24.25	13.63 ± 4.50	15.49 ± 4.29	17.54 ± 3.24	17.00 ± 2.63	15.48 ± 3.30	14.89 ± 4.65
-25	13.11 ± 3.68	15.71 ± 3.31	19.08 ± 2.98	18.16 ± 2.43	15.95 ± 2.91	14.43 ± 3.76
