# Supplementary material for: Permeability of the HIV-1 capsid to metabolites modulates viral DNA synthesis
Source: PLoS Biol. 2020 Dec 17;18(12):e3001015. doi: 10.1371/journal.pbio.3001015 (PMC7775124; doi:10.1371/journal.pbio.3001015)
Supplement: S17 Data — Numerical data for panels A, B, and C in S18 Fig. (XLSX) [file pbio.3001015.s048.xlsx]

## Sheet: S18A
dATP		dCTP		dGTP		dTTP		ATP		CTP		GTP		UTP
9.89473		13.0141		15.9		15.6006		15.2122		15.9467		13.9421		13.01
12.9766		16.4612		18.94		13.2965		15.894		15.3733		15.6439		14.035
13.9686		20.2247		14.22		9.37181		15.2457		15.5		17.8521		24.585
16.2221		11.8687		15.6667		18.6007		13.9421		15.8467		17.3721		14.805
16.0312		14.754		16.0933		15.0366		15.0649		8.09333		14.2468		10.985
11.1978		18.344		12.9867		17.8087		8.95653		21.5733		11.2857		11.335
14.6831		14.3021		15.56		13.1517		14.9675		12.8067		14.8522		11.205
14.0722		15.5722		15.7533		15.3297		16.4458		21.0267		12.4741		23.66
16.6094		18.9157		12.64		15.1566		16.593		15.0667		15.1257		11.765
9.99236		16.1558		13.7733		17.4427		19.0466		15.7333		15.0485		16.445
15.0922		15.1849		14.2467		21.3069		23.8409		17.4533		17.4276		14.815
15.9603		17.0185		14.0133		14.7117		16.053		15.3933		14.2748		9.88
15.5348		13.8112		19.7467		13.3677		17.9949		12.8867		14.553		15.485
14.4603		16.7939		14.48		12.5578		17.9175		20.78		15.0166		12.025
15.774		13.2275		13.0733		8.31633		16.0467		23.1867		13.1348		16.35
19.3575		13.1723		14.6067		17.5436		15.1576		18.94		13.6257		14.39
16.8058		15.3766		17.7533		8.86835		13.2166		13.5933		16.0203		13.045
21.4422		13.353		15.56		17.0997		15.6049		17.5667		18.7793		14.98
16.9357		15.894		16.5667		26.4851		15.3003		14.7267		17.5848		14.91
14.4758		21.3331		10.4933		13.8605		10.4833		15.1067		10.8875		17.83
17.2085		15.2013		14.7333		15.4926		14.874		12.32		16.353		20.13
17.2312		13.8275		13.66		14.7546		15.9385		18.66		17.9785		19.655
16.5003		19.6367		15.4		18.5696		13.1075		18.0733		12.545		13.665
14.5475		14.7922		16.9533		17.3576		15.1958		14.3667		15.2449		24.255
13.794		10.9147		14.7733		21.0248		17.013		15.1667		13.9195		19.36
13.4886		21.4847		17.0333		15.4437		15.6112		14.88		17.2848		15.945
19.5702		15.6876		17.32		14.9097		18.1575		15.4		15.534		16.935
16.6039		17.6994		21.1867		12.8525		13.1723		9.19333		15.9439		16.055
15.5948		12.0711		19.3533		16.2177		14.7166		18.2467		13.7886		14.05
14.9831		11.7384		14.4467		17.7176		14.9504		14.78		13.4395		14.485
21.4749		15.9322		16.4733		19.7696		14.8904		14.8867		14.9294		15.88
15.0876		17.5521		15.0333		7.6143		9.64329		20.3467		15.6485		15.04
16.1394		15.0657		21.1733		14.2977		24.6332		16.0133		18.1957		15.91
17.253		12.8239		14.48		16.2187		19.5276		14.5		16.2712		19.58
16.653		15.5067		15.1467		18.1076		11.3075		16.4867		18.4957		12.02
9.19603		16.0203		12.5867		13.9317		13.3413		18.6533		15.7748		15.4
23.5041		13.3093		14.4867		21.4809		20.6065		16.8933		19.3258		10.185
14.9348		14.6566		18.1867		20.1656		15.4585		14.28		17.4485		16.395
15.9985		17.6939		15.7467		26.1355		15.7803		16.4		12.5239		12.32
14.9504		10.4287		15.5267		12.7737		15.2176		14.9333		18.9484		16.365
9.81782		14.6013		20.0867		17.4187		15.5621		13.9733		14.6286		16.195
15.7803		15.5612		14.84		13.6437		14.4003		15.72		14.4166		13.245
17.6012		17.1494		16.32		8.77182		16.0249		14.2933		10.8705		7.74
18.2121		18.4094		14.8267		15.5226		15.1794		11.1933		18.7466		14.785
14.7922		17.5585		7.68667		16.6737		4.65801		15.2		17.0894		12.895
14.9886		15.9876		17.3267		8.49634		21.2229		13.38		18.0058		17.71
15.2067		14.694		14.4133		16.5307		16.3367		14.0667		10.4396		20.735

## Sheet: S18B
IP6		BHC
31.7847		31.36
30.0249		26.48
31.0132		27.8
31.3647		27.12
33.1647		29.06
31.2103		27.14
32.7076		26.8
31.4477		29.52
29.8217		27.52
31.3791		25.26
32.9162		18.68
28.5163		28.34
30.8477		28.02
31.0818		29.02
30.6789		31.58
30.8991		26.94
19.5183		22.7
30.1903		28.02
32.4591		27.78
31.9304		27.1
31.062		33.3
29.6674		25.12
27.6616		30.26
33.2133		27.36
32.0219		28.1
38.4075		36.98
32.5448		37.14
32.3991		30.48
40.3737		27.88
33.5676		35.4
34.262		25.1
33.8562		30.8
31.9705		34.92
34.5761		31.48
25.6707		26.88
33.0619		30.72
32.1275		33.68
35.8392		37.8
34.1647		15.98
29.8791		29.42
30.762		29.8
27.9678		27.02
33.3448		27.62
26.5387		28.7
32.1934		40.88
28.8102		26.26
35.7363		29.22
36.059		21.68
24.3507		27.62
38.2789		23.3
36.1875		26.88
28.7588		27.66
35.939		32.48
39.7446		30.96
33.2219		29.32
19.0211		30.8
31.3962		29.94
29.916		32.68
25.9386		29.38
35.8961		29.54
34.9019
40.9874
37.0961
34.5448
35.3849
34.9704
30.2734
30.096
34.3134
32.5448
34.0276
35.102
22.1584
29.7874
31.1648
36.6964
30.3703
28.3106
31.842
31.9818
34.6619
32.1533
31.5077
31.6877
30.3334
29.4703
38.0989
30.0617
29.0331
33.2505
26.9478
33.5733
27.7621
30.3617
30.9361
31.8532
33.7819
31.7247
34.922

## Sheet: S18C
2dATP		IP6 + dATP		BHC + dATP
32.2133		32.16		28.88
41.8667		38.7467		30.7733
26.5333		28.24		30.5333
35.8667		39.4667		22.9333
30.2133		31.1467		34.9867
27.68		40.8267		29.3067
28.32		22.5333		32.16
28.2667		38.4267		29.68
28.48		37.8933		26.7467
28.2133		41.7067		25.3067
33.8667		35.6533		32.2667
32.5333		37.6533		26.3733
30.0267		35.4133		26.1067
30.4		38.88		22.7467
28.6667		19.92		25.1467
26.96		29.28		29.68
17.12		33.3333		22.24
27.8933		40.1867		26.9333
30.0267		29.8667		30.2133
28.88		41.2267		34.7733
35.2267		22.3733		31.6533
26		30.5867		37.6267
27.28		26.32		34.1067
29.7867		31.8667		31.84
26.9333		23.92		30.2933
26.3467		31.8133		30.96
29.6267		30.72		27.7867
42.72		19.9467		33.8933
33.76		29.12		31.04
34.96		31.0667		36.16
29.4933		40.6933		28.2667
31.5733		25.0933		30.1333
29.8133		24.5333		30.4533
28.32		37.2		35.4933
28.0267		34.96		27.76
27.84		28.4		31.6267
31.7067		22.5333		31.7867
30.16		25.9467		35.2267
39.28		43.2533		37.9467
29.52		36.1333		33.7867
29.44		38.9867		18.2133
17.7867		42.8267		25.9467
39.44		25.7067		29.84
36		28.88		20.9333
29.6533		40.6667		31.2
28.32		41.12		33.4667
24.8533		25.9467		30.24
38.1867		26.0267		36.6133
26.4267		35.68		26.1333
38.6933		28.08		28.8267
41.92		28.5333		32.08
35.8933		41.12		31.2267
37.4667		25.7067		29.9733
38.6667		31.04		15.0933
24.8267		29.92		32.2133
29.8133		28.56		34.16
28.0533		28.8533		30.7733
32.3467		32.2933		41.2
26.2933		45.4133		35.36
24.88		35.7067		34.8533
40.7467		44.4		34.64
34.6933		37.7067		28.64
33.52		36.4533		29.2267
12.72		25.5733		28.08
29.7067		39.0133		29.2
41.4667		30.64		29.8933
32.5333		33.7067		27.1467
28.3467		32.2933		24.1333
30.08		38.9067		25.76
35.1467		38.48		24.5867
31.3333		42.24		30.2667
29.12		32.48		27.44
33.0933		29.2267		32.4
16.4267		38.7467		26.2933
33.04		24.4267		34.3733
30.2133		27.36		28.32
39.0667		29.8667		30.96
31.7333		33.6533		26.1867
30.3733		34.64		27.92
27.2533		31.36		23.68
26.32		40.56		33.6533
28.3733		30.5333		28.48
28.5333		30.16		38.9333
28		26.9867		30.5333
33.9733		28.72		27.3333
33.84		24.08		27.4667
28.5867		25.28		25.7067
32.8267		32.6933		16.08
28.2933		30.9067		26.64
26.1333		27.8933		36
26.4		32.3467		33.0133
30.1867		31.4933		24.56
33.36		29.1467		36.2667
25.12		30.9867		27.28
32.4		26.32		31.6267
32.6933		28		30.6667
30.88		33.3333		28.5067
29.92		30.9867		24.9333
25.6		26.5067		32
36.08		31.6533		28.3467
28.8		34.56		21.4133
35.1733		44.2667		29.6267
28.6133		29.9467		32.7467
28.9067		40.1067		23.92
35.52		30.3467		36.9067
25.28		31.3067		21.28
42.1067		17.4133		28.2133
38.08		33.7333		28.24
27.6		27.8933		29.76
31.5467		31.12		32.9067
30.2133		30.2667		33.2533
30.32		32.7467		31.4933
30.64		34.6133		10.64
30.16		38.9067		29.3333
21.2267		27.76		37.1733
33.2		30.3467		17.9467
29.9733		34.96		30.7733
29.92		32.2133		34.8533
32.7733		29.2		23.2267
33.2267		34.7733		31.8133
17.3333		40.5333		32.1333
24.4533		26.8		20.1067
19.4133		32.32		25.44
27.4933		35.7333		28.9067
26.2933		28.96		33.1467
30.5333		35.3867		25.8933
29.6267		23.8133		31.8933
29.5467		29.04		27.6267
34.4533		35.8933		31.76
22.48		29.6533		30.24
30.3467		25.6267		28.7467
28.88		30		33.7067
30.3733		28.5067		28.0267
30.9067		27.6		31.6
28.5067		30.0533		28
27.3333		31.3867		36.5867
33.9467		34.6667		28.6133
29.8933		33.6		32.3467
33.7333		29.84		32.1867
33.3333		19.7333		26.5333
34.3733		31.84		31.1467
30.72		28.6667		33.5467
40.56		36.08		31.0133
28.2667		35.04		26.88
32.5333		32.96		28.6667
31.1733		32.96		32.2133
27.1467		29.3067		19.4667
31.12		34.2933		36.3733
37.6		26.0533		24.9067
27.52		28.3467		34.6933
27.4667		43.8133		27.52
26.4267		35.0133		23.4667
40.6667		33.44		26.9333
37.2267		24.2133		28.9867
29.76		37.6267		23.8133
29.7067		27.3067		35.3867
30.16		36.5867		30.08
28.4267		37.2267		28.7733
30.1867		34.8		33.4933
26.6933		28.32		31.7333
30.3467		29.6		28.08
29.0133		32.9867		26.0533
24.6667		34.64		26.24
31.04		28.1867		32.7467
26.16		29.36		32.1067
37.3867		28.2667		37.4133
27.8133		28.2667		36.9867
30.3733		35.4667		29.3867
27.1733		24.8533		32.32
28.1867		24.08		26.5067
20.4		26.2667		30.1867
27.7867		33.8133		32.32
35.4667		29.0133		26.1867
28.2667		32.16		33.76
23.4133		34.4		33.6
27.7867		22.5333		33.12
33.7867		37.1733		28.72
31.4933		28.6933		33.5467
22.3733		26.48		37.8667
27.5467		35.36		30.8533
30.2933		26.6933		36.6667
29.4133		35.68		32.96
18.9067		37.9467		26.9867
28.3467		27.1733		31.0933
29.3333		27.0933		28.9067
33.5467		33.1733		28.4267
33.9733		14.1867		32.1067
31.12		26.0267		18.6667
31.2533		30.1067		30.64
30.88		41.28		26.56
27.04		38.16		35.8933
31.68		33.44		34.24
33.4133		20.16		31.12
32.1867		33.0933		34.2133
31.7867		29.6267		27.84
25.1467		38.1867		24.6133
26.8267		39.0933		31.3867
28.56		34.08		27.92
32.24		27.0133		32.16
26.4267		23.12		25.7867
32.0533		28.1867		28.5867
30.4533		41.28		33.1467
40		32.88		26.4
32.08		29.4667		31.3333
28.8533		32.2667		40.2133
37.2267		32.5333		37.76
34.32		47.1467		27.4933
38.7733		26.5067		32.4267
33.4933		24.4267		29.1467
31.9467		24.8533		32.7733
29.1467		33.5733		28.9333
29.84		26.2667		38.9867
32.6667		29.0667		37.68
32.16		28.5867		26.3733
31.0667		33.3067		23.9467
40.7733		33.3067		27.6
31.44		34		22.48
38.16		26.5067		28.8533
35.68		32.9333		29.12
27.6		41.1733		31.76
29.2267		36.5333		28.9333
27.5467		36.1333		32.64
34.4267		20.16		37.8133
36.1333		26.56		27.4933
36.24		41.7867		31.5467
31.4933		28.8		33.5733
27.7333		40.6933		28.96
26.24		32.96		32.32
29.28		39.8667		30.4
30.3733		39.6		25.3067
29.9467		28.5067		30.3733
23.12		37.4933		33.2267
31.2		34.6133		29.3067
26.8267		23.4933		23.3067
29.1733		31.0933		34.88
26.8267		41.2533		27.9467
31.4933		34.2133		30.2133
34.16		34.9867		30.2933
26.8267		32.5333		26.9867
33.0133		37.6		26.32
30.6933		28		30.9067
27.12		37.4133		28.9867
27.04		26.2933		41.2267
27.4667		26.9067		23.6267
34.1333		32.6667		24.1867
42.4267		25.4133		22.5067
27.9733		36.24		32.4533
27.3067		34.8533		30.8267
32.1333		38.9067		33.2
32.08		28.48		31.44
29.1467		40.4267		22.16
29.5467		37.1467		28.7733
30.6933		42.5067		37.6533
28.7733		31.4133		29.1467
33.92		36.1867		32.24
30.1333		31.9733		24.1333
28.1067		36.4267		40.7733
35.0667		31.2533		28.48
39.28		43.36		27.1733
27.7333		23.7867		37.6
25.7067		27.3333		35.7067
27.8133		25.5733		30.5067
35.92		33.7067		31.6533
21.28		27.0667		31.5733
29.3333		30.8533		30.5867
31.68		28.8267		27.2
40.4267		40.72		20.0267
27.2533		23.3867		30.0533
30.08		25.1467		32.2667
32.64		28.9067		31.76
29.5467		30.8267		30.0533
40.1333		35.6533		24.16
31.8933		27.6		40.4267
31.1467		29.68		27.8933
33.68		28.8533		29.0667
28.16		23.8933		16.9067
20.08		29.44		34.5867
34.72		39.0667		27.4667
33.8933		28.4		28
34.08		34.0533		33.04
30.7733		29.0133		22.5867
30.1333		29.8133		28.2667
27.9733		32.1867		31.1733
32.64		31.3333		15.2
34.16		34.6933		29.8933
30.5867		30.1867		27.52
33.8667		28.2667		32.88
31.9733		25.1467		27.92
29.92		27.8933		32.7467
24.8267		21.4133		29.8933
27.1467		31.4667		32.2133
38.0533		27.4133		29.44
18.6933		39.9467		21.9733
27.6		33.6267		35.9733
33.28		24.08		16.6667
32.1867		27.0667		32
32.2667		28.4		27.0667
36.3733		31.92		28.08
30.08		30.1333		30.9067
24.7733		36.32		21.5733
27.1733		31.92		30.3467
29.7067		37.36		31.1733
29.1733		27.5467		30.1867
29.84		35.6		26.8267
26.5067		31.1467		22.5333
27.44		24		30.8533
29.92		34.9333		19.12
36.16		32.9067		32.32
30.8267		22.96		35.2
29.4133		35.92		24.0533
26.96		24.4267		33.7333
34.32		28.6933		24.8267
29.8933		40		29.5733
36.88		38.6133		24.1067
29.3333		34.08		30.2667
30.8267		28.56		33.68
25.52		29.7333		36.6933
27.3867		17.2533		26.5333
38.32		28.1867		26.5333
29.52		29.5467		30.1333
35.44		35.4133		33.6267
35.5467		37.1733		31.84
41.0667		39.0933		28.9333
30.64		41.2267		39.5467
28.9867		26		28.0267
34.4533		24.0267		27.1733
26		34.08		34
41.1467		25.4667		30.1867
31.6533		26.72		27.12
38.9067		29.2533		31.3333
31.8667		26.48		40.24
29.7867		28.1333		28.9067
28.08		35.0133		39.7333
28.6133		41.9467		24.9067
29.1733		24.6667		26.96
30.0267		37.84		23.7333
38.9867		29.2		24.4533
30.9333		30.56		29.4667
32.3733		27.8667		26.1333
30.8533		30.72		33.6267
28.9867		25.76		16.1067
34.8		31.2		33.7067
25.8133		27.68		26.0533
36.3733		32.1067		27.5733
31.2267		36.88		24.64
26.5333		28.6133		33.04
30.4533		30		36.7467
34.2933		33.84		29.8133
41.92		29.6267		30.0533
34.6667		33.44		28.4
33.6267		31.84		29.0133
37.4667		19.9467		35.5467
26.2933		32.1333		19.3067
25.92		28.0533		27.0133
28.08		25.0933		33.7867
25.3333		41.0133		30.9067
33.12		31.3067		29.92
33.1467		32.7733		26.5067
30.64		38.3733		35.36
36.2133		41.1467		30.3733
31.0133		40.0267		24.48
30.4267		30.72		27.6533
35.2267		26.9067		26.6133
29.12		32.7733		28.4533
32.32		35.04		33.9467
25.0133		29.76		30.2667
31.8133		33.7333		25.0133
32.0533		34.96		31.3067
27.76		26.56		31.44
28.1867		32.24		29.5733
28.2667		27.3867		37.3333
31.68		28.9867		30.7467
27.0133		38.72		37.36
28		43.0933		37.2
33.6533		38.4		34.8
34.4533		26.72		35.5733
22.56		37.5467		27.2267
29.3867		34.7733		31.76
28.24		34.5067		23.8133
29.7333		31.2533		31.3867
30.5333		30.5333		26.0533
39.28		27.4667		31.5467
32.9333		31.9733		27.2267
32.6667		39.52		29.4133
28.64		29.3867		28.9867
33.7333		20.72		36.64
27.2267		31.3333		31.8133
35.2		29.76		29.28
25.6		22.6933		34.64
32.0533		34.3733		24.1333
30.7733		31.5733		38.6133
30.3467		24.32		32.6933
28.24		27.1733		35.3067
29.92		33.5467		26.5067
28.5333		36.2133		36.4
24.9067		32.4533		34.2133
27.8667		30.8267		38.6667
39.4133		39.9733		37.2533
32.6667		31.12		36.08
32.1067		31.3067		30.88
38.48		27.4133		28.5067
30.6667		24.88		34.0533
30.9067		23.36		27.2533
29.8933		34.9333		27.6533
18.08		25.36		33.6
32.4		20.0267		31.3333
29.4933		33.9733		27.4133
35.76		28.2933		39.5467
29.36		35.0133		27.8933
30.5867		32.08		28.6933
34.2667		35.6		28.3733
27.04		43.0133		36.0533
23.6533		25.04		23.92
28.4533		36.4267		30.8
30.3733		24.5867		32.3467
32.6667		40.16		28.9333
27.2267		28.8		29.52
33.0933		33.0133		30.56
33.5467		32.9867		25.7067
21.2533		32.8267		30.5867
30.3733		37.2533		32.8533
36.2133		29.4133		13.6533
40.08		26.8533		31.7867
28.72		35.2267		36.4
32.2667		35.2267		34.48
38.56		27.4933		31.5467
40.1067		35.2		26.72
30.4267		27.76		27.36
24.9067		30.6667		33.0933
31.9733		27.5733		27.2
33.2533		35.12		35.5733
29.5467		29.8133		36.56
42.1333		23.6533		28.2133
31.5733		42.72		29.4933
32.5067		21.6		28.96
33.36		22.72		35.3867
27.8933		38.7733		28.88
41.1733		39.8133		25.3867
30.1333		29.5733		36.4533
30.6667		39.76		30.24
38.8267		27.8933		37.4133
28.72		27.7333		32.0267
23.68		31.2		27.4933
32.1333		21.52		33.0133
24.2667		31.8933		35.28
27.92		40.2133		29.4933
40		36.7733		25.4133
27.3333		31.2267		33.2533
35.3333		17.04		34.7467
26.88		40.1867		16.08
28.9067		30.9067		29.2
30.8267		25.7867		28.8
30.72		40.2667		29.6
24.4533		39.44		26.3733
26.0267		21.1467		24.9333
32.9333		36.48		40.1067
34.8267		39.8933		25.52
27.0133		35.2533		33.9733
33.3067		23.76		34.24
31.9467		29.28		26.64
29.3333		30.88		11.8933
27.7867		38.1867		35.04
25.0667		32.8		23.6
29.4133		40.4533		27.3333
33.44		32.5067		31.7067
31.8667		23.28		22.56
28.0533		38.9067		25.8133
27.4133		33.12		26.5333
34.64		25.3333		26.96
29.6		28.16		32.88
32.96		41.0133		31.7867
34.56		29.1733		34.9867
30.08		23.2267		28.9333
27.6		41.3067		35.1733
42.64		34.1867		26.6933
35.52		27.4667		27.1467
29.2533		35.04		30.9333
34.32		32.9067		31.04
31.1733		27.04		30.3733
32		35.4933		29.5733
27.44		29.84		33.68
30.8		17.2		31.0933
30.6933		32.16		29.2267
28.9067		27.6		30.64
30		36.72		38.1867
33.76		38.2133		30.5867
29.3067		40.32		42.32
33.6267		29.3333		35.12
30.7467		33.68		30.1333
27.2		38.96		27.84
26.32		24.0533		31.2
33.0933		30.4533		30.96
32.9867		31.6		31.84
31.92		36.64		33.4667
24.9067		23.36		19.36
28.4267		23.3867		20.6667
30.8		21.76		26.1067
33.0133		37.9467		40.8
28.9867		35.28		28.8533
17.9467		37.44		26.6933
32.3733		36.8		29.4667
27.36		34.32		37.3867
30.6667		28.2133		32.7467
25.0133		28.32		36.5333
34.1067		29.76		31.84
28.48		27.2		39.1733
34.5333		29.0933		33.12
35.4133		38.3733		27.84
31.84		33.68		35.4133
25.6533		37.76		31.8933
36.16		35.76		25.6
32.8533		28.8		29.6533
22.4533		26.32		36.08
39.76		37.36		30.0533
41.0933		18.96		24.4
27.84		27.7867		27.1733
30.3733		31.0133		27.7867
40.9333		28.2133		31.36
31.9467		42.8533		26.48
24.2133		34.6933		27.3867
30.9333		30.3733		30.88
30.1333		38.1867		32.9333
29.8667		34.6933		31.4667
33.2533		28.48		29.5733
28.5333		28.9067		24.7467
27.5733		28.6667		27.7333
28.0533		28.0533		26
30.8		26.2667		24.56
26.2933		38.5867		34.64
28.96		31.7333		34.6933
34.2133		34.6133		33.2533
32.5867		31.0133		18.1067
37.2267		27.8667		22.3733
29.9733		34.88		25.76
32.16		33.4133		34.4
29.9733		34.32		36.9867
27.4667		30.7733		30.1333
27.12		33.3333		31.8133
31.1467		36.4		29.44
37.36		30.5067		34.9333
30.0267		29.2		30.56
21.7333		29.9467		24.7467
17.8933		26.48		29.9467
34.72		39.4667		38.2667
33.4933		26.8		32.1867
29.9733		14.6933		31.7067
25.9467		34.2133		19.1467
32.8267		33.4933		22.8267
26.24		43.5467		32.08
30.4267		29.3867		34.9867
36.08		39.0933		36.0533
33.5733		28.32		32.1333
38.24		30.8		37.8133
32.96		38.24		32.7467
25.1467		33.3867		29.3333
39.2533		28.96		28.4267
30.2667		26.9333		35.12
26.08		31.2267		32.8267
32.3467		16.24		22.2933
28.72		36.4533		26.3733
28.4267		31.04		26.64
33.8133		39.6		32.7467
29.7867		28.64		22.7733
35.04		35.7067		38.6667
27.5733		39.5467		29.5733
31.5733		30.0533		28.1333
25.0933		30.16		20.9333
29.9733		27.0133		30.0267
28.7733		29.0667		31.7867
37.68		36.9067		40.1067
28.96		27.12		22.96
33.6267		34.6933		36.7467
32.9867		28.5867		32.4267
24.1333		26.5333		31.3333
34.1067		32.0533		38.7467
24.5867		39.6267		24.24
29.9733		27.3867		35.7333
31.3867		26.32		35.3867
35.84		28.9067		29.4667
30.9067		37.8667		36.4267
29.1733		33.92		28.64
31.68		27.9733		23.2
35.7867		34.8267		30.5867
29.4667		22.5333		29.6267
35.2267		34.2133		33.3333
33.8933		21.4133		32.6667
40.88		28.56		24.1867
26.5067		34.2133		33.44
36.9867		29.7067		33.8133
33.4133		30.6667		37.4933
26.9333		35.3067		30.6667
25.1467		23.3867		28.0533
29.8667		26.2133		29.84
33.52		31.3333		30.64
28.1867		33.7067		36.5067
29.04		42.8267		34.7733
31.04		24.72		33.0667
35.6267		40.6933		26.24
30.6133		24.64		31.5467
26		35.8133		29.9733
35.7333		30.72		22
28.7733		32.2933		27.8667
28.8		34.3733		32.24
27.4133		26.3467		31.4667
34.9867		41.2267		27.6
30.6667		35.04		29.92
28.6667		29.44		26.7467
25.9467		33.1733		31.3867
31.04		21.2533		27.0133
24.6133		37.0933		33.0933
38.2933		33.68		26.56
26.7733		28.0533		37.44
32.9867		41.0667		28.8
32.8533		33.76		25.7067
32.9333		33.0667		29.8933
36.64		25.0933		26.1867
28.96		24.2933		33.8133
31.2		26.6933		40.8267
34.2133		36.9067		29.0133
32.7467		34.32		38.9067
39.04		34.7467		37.3333
38.56		28.0267		30
31.0933		34.08		29.0667
29.68		24.4		32.1867
32.64		32.4267		28.08
26.88		26.88		27.2533
28.08		32.48		36.8267
37.76		37.0933		31.52
33.6533		30.9333		30.72
35.8933		29.84		28.9333
36.5333		31.0133		22.24
29.2267		23.4933		25.8933
33.9733		27.92		28.1333
24.8533		29.5733		30.0267
30.24		31.0133		30.6133
28.4533		32.8		26.3467
33.2		27.28		30.4267
28.88		43.3067		25.7333
30.4267		28.9333		32.9067
27.52		26.72		32.48
31.9467		26.5867		30.56
28.9067		33.8667		32.24
29.0133		38.48		33.4133
32.0533		35.5467		34.1867
29.6267		26.4267		27.8133
33.1733		23.7067		30.8267
29.9467		26.0267		39.4667
29.5467		27.44		27.7333
31.2267		25.2		32.5867
27.7067		29.84		32.1333
33.3867		30.2933		26
38.1867		25.3867		29.4933
27.0133		33.2267		32.4267
29.4667		28.96		27.3067
30.8267		33.6533		17.7067
32		28.48		34.08
31.36		27.7333		27.9467
29.6533		34.88		35.6267
28.2133		29.3333		35.7067
28.2933		35.2533		31.04
33.0667		42.1067		40.7467
30.2933		30.1867		35.36
34.7733		30.4		23.4667
24.4		35.0933		26.2133
27.5467		40.6133		27.2533
33.0667		26.9067		27.2267
39.68		33.2533		23.5467
35.52		33.4667		33.76
33.5733		33.12		28.48
29.7867		24.88		31.8667
38.7467		26.32		38.5067
35.5733		28.4267		32.16
30.5333		38.6933		26.1067
34.5333		18.1333		27.28
		21.52		35.3867
		21.5733		30.7733
		27.68		27.1733
		32.6133		30.5067
		33.84		30.4533
		28.3733		33.6533
		24.6667		27.4933
		36.08		30.32
		26.72		17.5467
		34.8267		40.1067
		34.32		32.3733
		20.1333		31.68
		18.7733		35.2267
		35.7867		33.4933
		32.1067		33.2533
		35.3333		31.4133
		22.48		32.2133
		16.6667		37.76
		30.8533		32.3467
		31.5733		27.12
		19.9733		31.8667
		28.64		29.4667
		41.1733		27.6267
		36.9333		38.0533
		38.1067		34.5867
		29.8933		27.4933
		27.8933		29.2
		34.24		30.96
		32.3467		29.3333
		31.0133		21.7867
		29.6267		30.6133
		32.4		30.9867
		27.7067		26.56
		26.1067		24.2933
		24.6933		26.9067
		34.3733		27.92
		35.6		30.64
		34.48		24.1333
		33.0667		25.8133
		26.4533		27.7067
		28.32		30.4
		27.8667		38.3733
		36.1067		27.2267
		34.8533		22.32
		27.8667		29.52
		34.96		28.5867
		29.6267		27.8667
		34.2667		31.68
		35.76		35.92
		38.5867		27.76
		28.6933		35.1733
		31.3333		24.9067
		28.6933		26.7467
		35.3867		30.8
		27.84		36.0533
		34.9867		38
		36.8267		32.5333
		42.88		24.6133
		34.3733		28.56
		33.5467		37.6
		23.6		31.4933
		35.04		19.9733
		30.9867		34.64
				31.52
				34.9333
				26.8267
				23.7867
				35.4133
				29.5467
				28.1067
				32.7467
				30.32
				29.5733
				30.7733
				29.76
				33.4933
				30.1067
				32.5333
				25.5733
				32.5867
				27.2
				32.88
				28.9067
				27.7333
				23.8667
				20.48
				25.68
				34.6667
				22.5867
				36.1067
				32.0533
				23.76
				31.3867
				39.2267
				29.3067
				34.2933
				33.0667
				28.9333
				35.0933
				32.5067
				29.28
				24.1333
				35.04
				24.2133
				36.1867
				33.6
				27.2
				28.2133
				31.2533
				30.72
				34.96
				31.0667
				29.28
				32.24
				25.52
				25.0933
				29.3333
				35.3867
				34.56
				21.7333
				38.6133
				25.8667
				33.04
				22.4533
				30.64
				23.5733
				33.6267
				22.2667
				31.0133
				29.0667
				31.0667
				26.24
				32.5067
				32.0267
				37.1467
				33.4933
				34.32
				43.2267
				28.4267
				30.72
				35.0133
				31.3067
				31.5733
				28.8533
				31.6533
				25.7867
				34.3467
				30
				30.9867
				25.2533
				32.4267
				25.0667
				34.5333
				35.76
				32.1333
				29.3333
				26.0533
				31.4933
				28.0533
				27.52
				37.3067
				33.4133
				27.36
				37.8133
				37.1467
				29.04
				35.28
				31.5733
				29.0667
				18.56
				29.2533
				28.1867
				36.48
				36
				36.7467
				29.2
				33.5467
				35.7867
				28.72
				31.6
				23.0933
				38.5067
				31.6533
				25.9467
				27.92
				30.48
				33.84
				26.64
				27.4667
				27.76
				24.8
				32
				22.2133
				30.8
				27.92
				31.7333
				34.48
				31.04
				28.5067
				25.76
				23.4133
				31.3867
				28.56
				33.8933
				25.8667
				30.16
				21.12
				25.5467
				27.7333
				28.9067
				32.9867
				31.2533
				24.24
				28.72
				36.9333
				24.72
				36.2667
				34.5867
				33.4933
				32.8267
				34.3467
				28.5333
				37.0667
				34.1867
				39.4667
				28.1867
				28.8
				34.64
				29.3067
				26.88
				22.88
				21.6267
				19.5733
				31.8133
				26.1867
				19.2
				32.2933
				23.12
				26.9867
				27.92
				37.6
				28.4267
				33.6267
				32.9333
				33.1467
				34.6667
				27.6533
				26.96
				22.24
				28.08
				34.88
				22
				29.8667
				35.7067
				28.32
				30.8
				33.3333
				25.52
				17.7067
				34.0533
				29.2
				38.1333
